# Supplementary material
Source: PubMed Central journal article supplement (PMC5364352)

Figure S1

Group 1.2

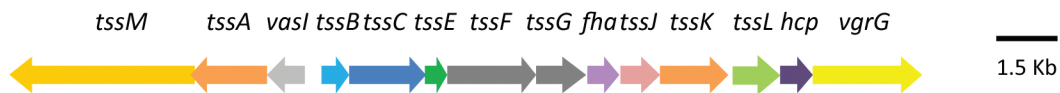

Group 2

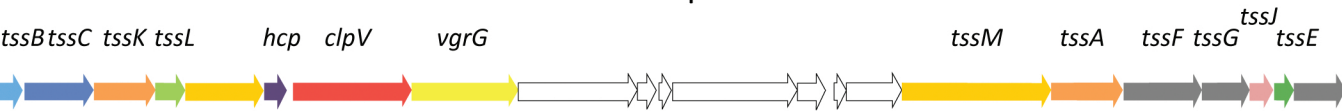

Group 4B

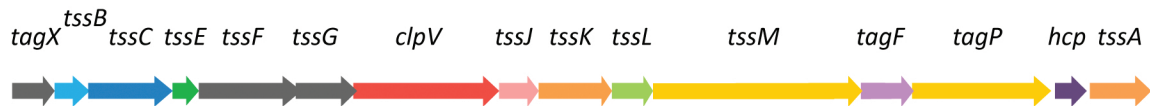

Supplement: ismej2016169x1.pdf [file ismej2016169x1.pdf]
