# Supplementary material
Source: PubMed Central journal article supplement (PMC5364352)
Supplement: ismej2016169x2.pdf [file ismej2016169x2.pdf]

Figure S2

a

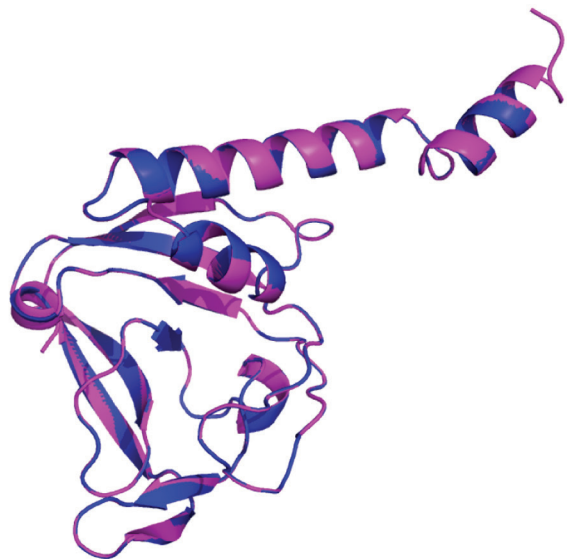

■ Tke1  
■ Tse6

b

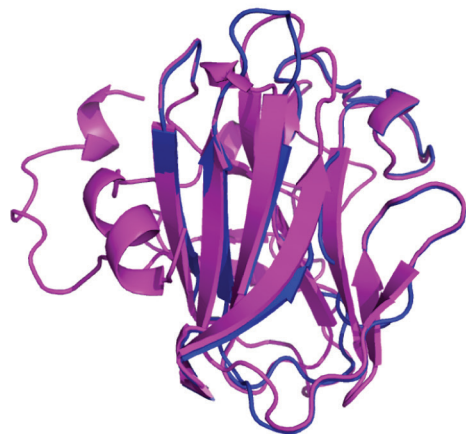

■ Tke3  
■ B30.2 (TRIM20)
