# Supplementary material
Source: PubMed Central journal article supplement (PMC5364352)

# Figure S3

KT2440

rpoN::Km

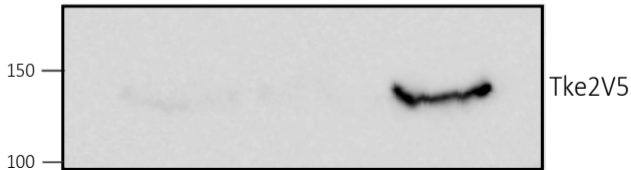

Supplement: ismej2016169x3.pdf [file ismej2016169x3.pdf]
