# Supplementary material
Source: PubMed Central journal article supplement (PMC5364352)

Figure S4

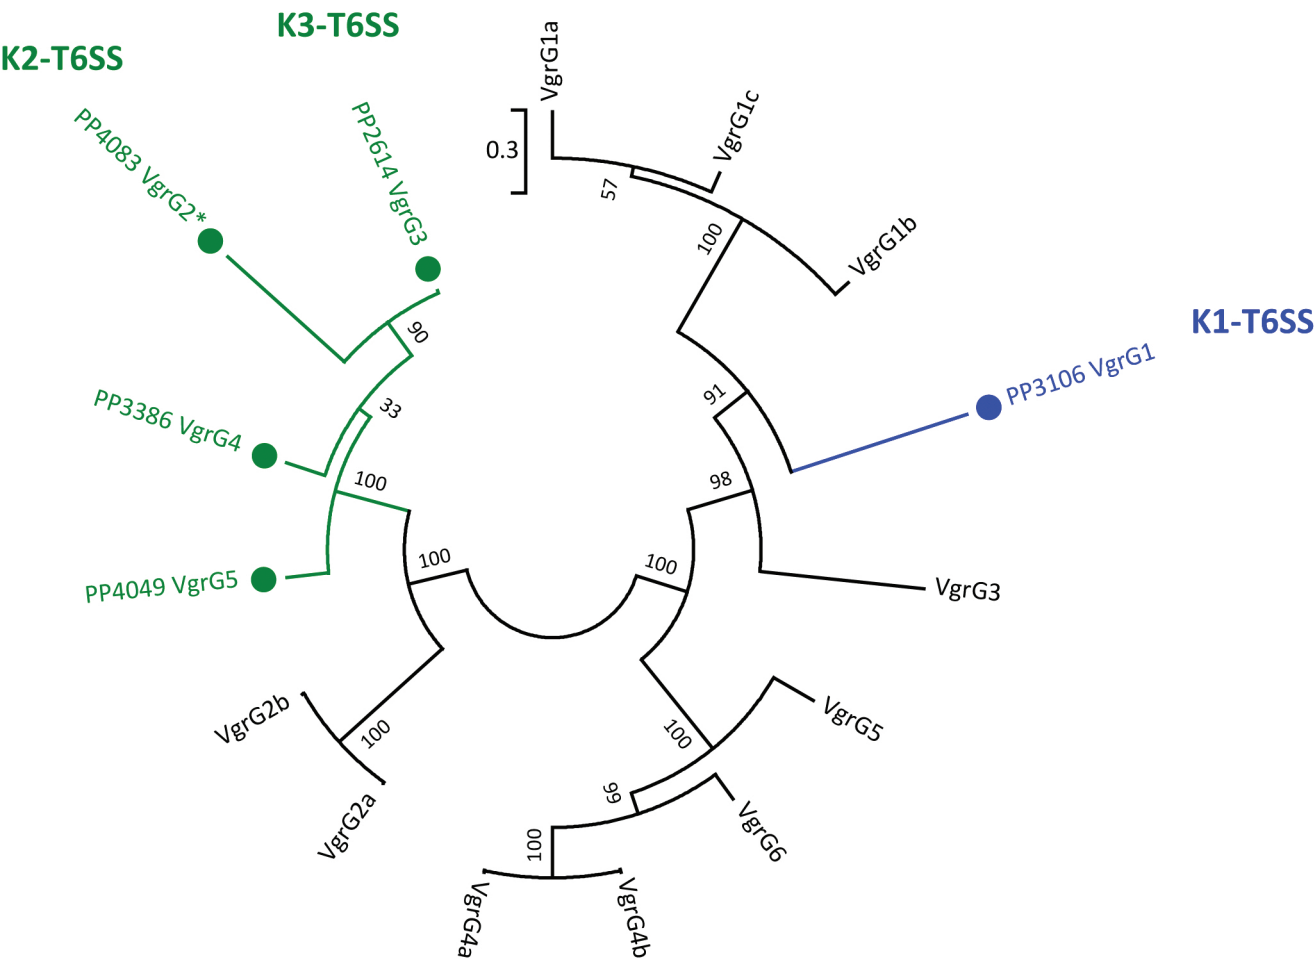

Supplement: ismej2016169x4.pdf [file ismej2016169x4.pdf]
