# Supplementary material
Source: PubMed Central journal article supplement (PMC5364352)

Figure S5

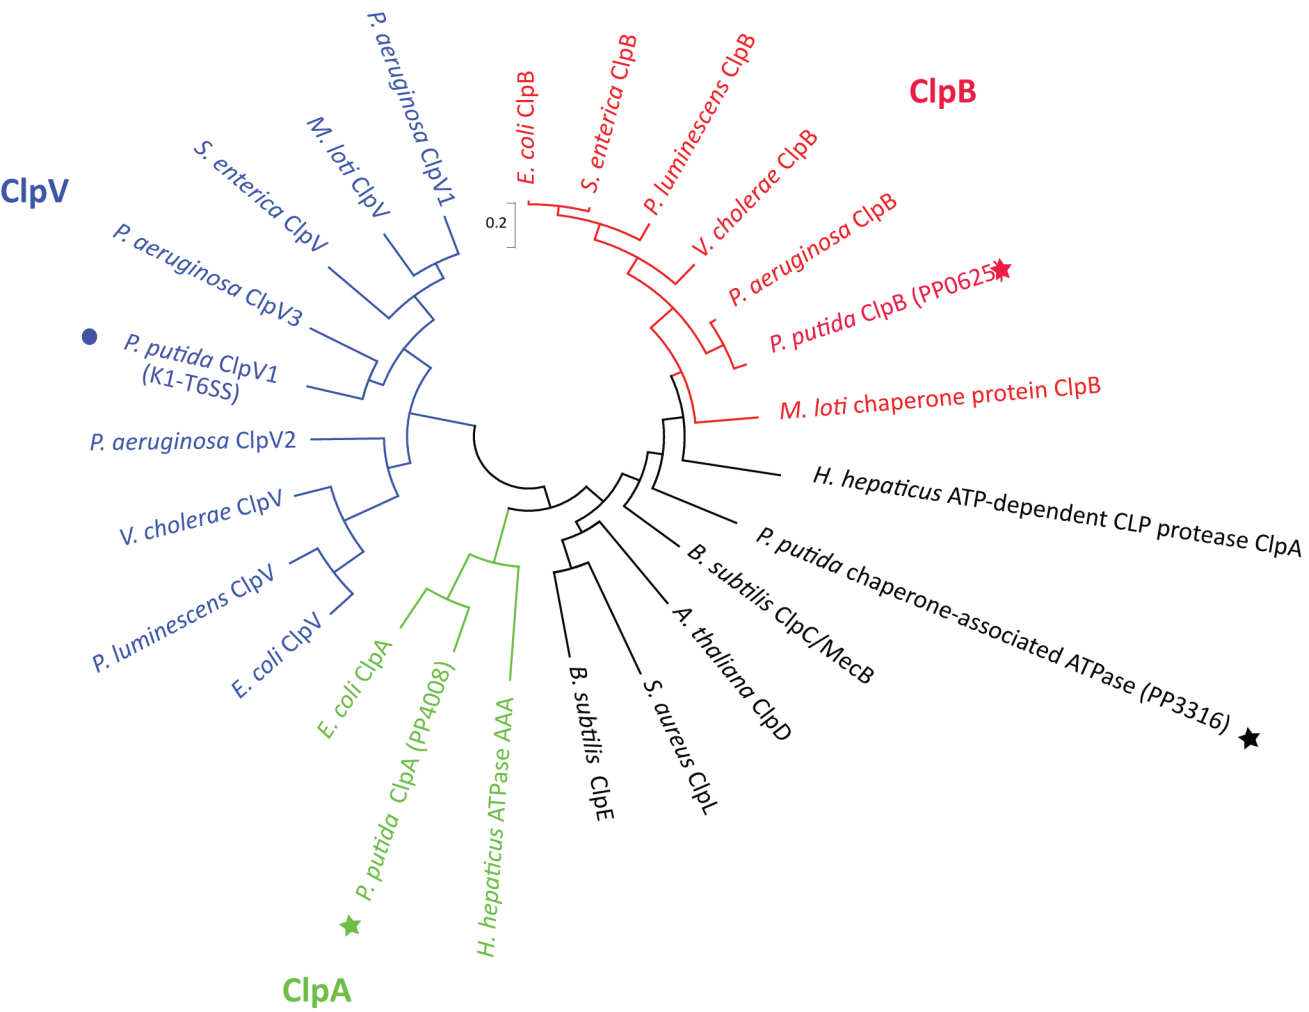

Supplement: ismej2016169x5.pdf [file ismej2016169x5.pdf]
