# Supplementary material
Source: PubMed Central journal article supplement (PMC5364352)

# Figure S6

a

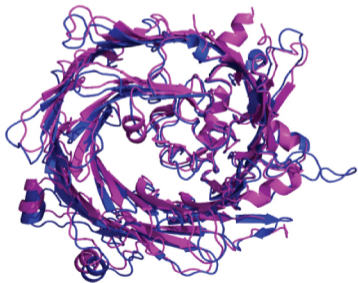

■ Rhs-Tke2  
■ Rhs-ABC toxin

b

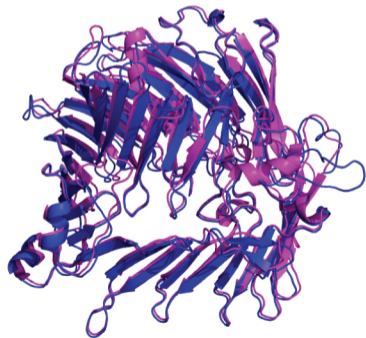

Supplement: ismej2016169x6.pdf [file ismej2016169x6.pdf]
